# Supplementary material
Source: PubMed Central journal article supplement (PMC3146252)
Supplement: supp_me.2011-0009_ME_11_0009_tabs_1_and_2.pdf [file supp_me.2011-0009_ME_11_0009_tabs_1_and_2.pdf]

## Supplemental Data

**Supplement Table 1.** Normalized values of  $G\alpha_s$  expression and  $R_{max}$  for LHR and  $\beta_2$ -AR<sup>a</sup>.

| $G\alpha_s$    | W <sup>b</sup> | CTX <sup>c</sup> | W/C <sup>d</sup> | $R_{max}$ <sup>e</sup> | $R_{max}$ <sup>f</sup> | $R_{max}$ <sup>g</sup> | $R_{max}$ <sup>e</sup> | $R_{max}$ <sup>h</sup> | $R_{max}$ <sup>i</sup> |
|----------------|----------------|------------------|------------------|------------------------|------------------------|------------------------|------------------------|------------------------|------------------------|
|                | $G\alpha_s$    | $G\alpha_s$      | $G\alpha_s$      | LHR                    | LHR                    | LHR                    | AR                     | AR                     | AR                     |
| WT             | 1.00           | 1.00             | 1.00             | 1.00                   | 1.00                   | 1.00                   | 1.00                   | 1.00                   | 1.00                   |
| L394+A         | 0.72           | 0.71             | 1.01             | 0.58                   | 0.80                   | 0.81                   | 0.22                   | 0.30                   | 0.31                   |
| $\Delta$ 394   | 1.15           | 0.45             | 2.53             | 0.56                   | 0.49                   | 1.24                   | 0.02                   | 0.02                   | 0.04                   |
| $\Delta$ 393-4 | 0.92           | 1.23             | 0.75             | 0.03                   | 0.03                   | 0.02                   | 0.00                   | 0.00                   | 0.00                   |
| $\Delta$ 392-4 | 0.37           | 0.37             | 1.00             | 0.01                   | 0.04                   | 0.04                   | 0.00                   | 0.00                   | 0.00                   |
| $\Delta$ 391-4 | 0.83           | 0.37             | 2.25             | 0.01                   | 0.01                   | 0.01                   | 0.00                   | 0.00                   | 0.00                   |
| L394A          | 1.14           | 1.29             | 0.89             | 0.93                   | 0.81                   | 0.72                   | 0.18                   | 0.16                   | 0.14                   |
| L394F          | 0.16           | 1.28             | 0.12             | 2.59                   | 16.67                  | 2.02                   | 0.81                   | 5.22                   | 0.63                   |
| L394D          | 0.75           | 1.20             | 0.62             | 2.42                   | 3.22                   | 2.01                   | 0.32                   | 0.42                   | 0.26                   |
| L394K          | 0.93           | 0.35             | 2.64             | 0.74                   | 0.80                   | 2.11                   | 0.12                   | 0.12                   | 0.33                   |
| L393A          | 1.69           | 0.45             | 3.76             | 0.02                   | 0.01                   | 0.04                   | 0.00                   | 0.00                   | 0.00                   |
| L393I          | 1.28           | 1.24             | 1.03             | 1.97                   | 1.54                   | 1.58                   | 0.73                   | 0.57                   | 0.59                   |
| L393D          | 0.78           | 0.34             | 2.32             | 0.01                   | 0.01                   | 0.02                   | 0.00                   | 0.00                   | 0.00                   |
| L393K          | 0.73           | 0.48             | 1.51             | 0.00                   | 0.00                   | 0.00                   | 0.00                   | 0.00                   | 0.00                   |
| E392A          | 0.58           | 0.13             | 4.52             | 0.44                   | 0.75                   | 3.40                   | 0.22                   | 0.37                   | 1.69                   |
| E392R          | 1.02           | 0.43             | 2.37             | 0.27                   | 0.26                   | 0.62                   | 0.24                   | 0.23                   | 0.55                   |
| E392Q          | 0.50           | 0.61             | 0.81             | 0.67                   | 1.35                   | 1.09                   | 0.43                   | 0.87                   | 0.71                   |
| E392V          | 0.73           | 0.14             | 5.25             | 0.79                   | 1.08                   | 5.66                   | 0.06                   | 0.09                   | 0.46                   |
| E392L          | 0.13           | 0.23             | 0.59             | 0.78                   | 5.84                   | 3.47                   | 0.15                   | 1.08                   | 0.64                   |
| E392S          | 0.24           | 0.73             | 0.33             | 0.84                   | 3.47                   | 1.14                   | 0.36                   | 1.49                   | 0.49                   |
| Y391A          | 0.34           | 0.48             | 0.70             | 0.22                   | 0.65                   | 1.88                   | 0.17                   | 0.51                   | 0.36                   |
| Y391F          | 0.61           | 0.13             | 4.84             | 1.08                   | 1.77                   | 8.55                   | 0.20                   | 0.33                   | 1.61                   |
| Q390A          | 1.34           | 0.47             | 2.84             | 0.88                   | 0.66                   | 1.88                   | 0.88                   | 0.66                   | 1.87                   |
| R389A          | 0.64           | 0.31             | 2.03             | 0.93                   | 1.45                   | 2.94                   | 0.68                   | 1.06                   | 2.17                   |
| R389P          | 1.00           | 0.36             | 2.79             | 0.01                   | 0.01                   | 0.03                   | 0.00                   | 0.00                   | 0.00                   |

<sup>a</sup>For clarity of presentation, mean values rounded to two decimal positions are shown without the SEMs, and all values are normalized to that of wild-type  $G\alpha_s$ . [N.B. In some cases there may appear to be small discrepancies between the numbers given and their ratio. This arises because three decimal positions were used to determine the ratios; then the number was rounded to two decimal positions.]

<sup>b</sup>Normalization of Western blots (W) to wild-type (WT)  $G\alpha_s$ . A representative blot is shown in Fig. 4.

<sup>c</sup>Normalization of CTX-stimulated cAMP to WT  $G\alpha_s$  (Fig. 3A).

<sup>d</sup>Ratio of the normalized Western results to the normalized CTX data.

<sup>e</sup>For each receptor, basal cAMP was subtracted from the respective  $R_{max}$  for each  $G\alpha_s$  mutant, and this difference was normalized to that of wild-type  $G\alpha_s$  minus basal cAMP as shown below.  $[(R_{max} - basal)_{mutant}/(R_{max} - basal)_{WT}]$  The data were taken from Table 1 and Figs. 3B, 5, and 6.

<sup>f</sup>The values of  $[(R_{\max} - \text{basal cAMP})_{\text{mutant}} / (R_{\max} - \text{basal cAMP})_{\text{WT}}]_{\text{LHR}}$  were normalized to the expression (normalized) as monitored by Western blots. The results reported in Table 1 and Figs. 3B and 5 were used for these calculations.

<sup>g</sup>The values of  $[(R_{\max} - \text{basal cAMP})_{\text{mutant}} / (R_{\max} - \text{basal cAMP})_{\text{WT}}]_{\beta_2\text{-AR}}$  were normalized to the expression (normalized) as monitored by CTX stimulation of cAMP. The data shown in Table 1 and Figs. 3B and 6 were used for these determinations.

<sup>h</sup>The values of  $[(R_{\max} - \text{basal cAMP})_{\text{mutant}} / (R_{\max} - \text{basal cAMP})_{\text{WT}}]_{\beta_2\text{-AR}}$  were normalized to the expression (normalized) as monitored by Western blots. The results reported in Table 1 and Figs. 3B and 6 were used for these calculations.

<sup>i</sup>The values of  $[(R_{\max} - \text{basal cAMP})_{\text{mutant}} / (R_{\max} - \text{basal cAMP})_{\text{WT}}]_{\beta_2\text{-AR}}$  were normalized to the expression (normalized) as monitored by CTX stimulation of cAMP. The results reported in Table 1 and Figs. 3B and 6 were used for these calculations.

**Supplement Table 2.** Summary of predicted interactions between  $G\alpha_s$  and LHR and  $\beta_2\text{-AR}$ <sup>a</sup>.

| <u><math>G\alpha_s</math></u> | <u>LHR</u>                | <u>Mode of interaction</u> | <u><math>\beta_2\text{-AR}</math></u> | <u>Mode of interaction</u>                  |
|-------------------------------|---------------------------|----------------------------|---------------------------------------|---------------------------------------------|
| L394                          | K563 (helix 6)            | Salt bridge <sup>b</sup>   | K270 plus A271 (helix 6)              | Salt bridge plus van der Waals <sup>c</sup> |
| L393                          | I468 (helix 3)            | van der Waals              | I135 (helix 3)<br>L275 (helix 6)      | van der Waals                               |
| E392                          | R464 (helix 3, DRY motif) | Salt bridge                | R131 (helix 3, DRY motif)             | Salt bridge                                 |
| Y391                          | Y470 (IL2)                | van der Waals              | I135 (helix 3)                        | van der Waals                               |

<sup>a</sup>These predicted interactions are from the models presented in Figs. 7 and 8.

<sup>b</sup>The salt bridge involves the  $\alpha$ -carboxylate group of L394 ( $G\alpha_s$ ) and the  $\epsilon$ -amino group of K563 (LHR).

<sup>c</sup>The salt bridge involves the  $\alpha$ -carboxylate group of L394 ( $G\alpha_s$ ) and the  $\epsilon$ -amino group of K270; in addition, there are van der Waals interactions between the side chain of L394 and those of K270 and A271.

**Discussion of results in Supplement Tables 1 and 2**

A comparison of the expression levels as judged by Western blots and CTX stimulation of cAMP (Supplemental Table 1) shows there is excellent agreement with several of the  $G\alpha_s$  mutants: L394+A,  $\Delta$ 392-394, L394A, and L393I. For others the agreement is within 2-2.5-fold (and generally less):  $\Delta$ 393-394,  $\Delta$ 391-394, L394D, L393K, E392R, E392Q, E392L, Y391A, and R389A. Expression levels for the other mutants differ more than 2.5-fold. As discussed in the text, the levels estimated by CTX stimulation of cAMP are preferred to the data from Western blots as these values reflect to a greater extent functional  $G\alpha_s$ . Interestingly, a qualitative assessment of  $G\alpha_s$  functionality with ligand stimulation of both LHR and  $\beta_2\text{-AR}$  is similar using just the normalized values,  $[(R_{\max} - \text{basal cAMP})_{\text{mutant}} / (R_{\max} - \text{basal cAMP})_{\text{WT}}]$ , or the same corrected for expression by either Western blots or CTX stimulation of cAMP.

In Supplemental Table 2 the predicted interactions of the  $G\alpha_s$  CT with LHR and with  $\beta_2$ -AR involve the same four CT amino acid residues of the G protein. There are similarities in many of the contacts with the two receptors, but there are also significant differences. For example, a salt bridge occurs between the  $\alpha$ -carboxylate of  $G\alpha_s$  L394 and the  $\epsilon$ -amino group of a Lys in helix 6 of the receptors: K563 of LHR and K270 of  $\beta_2$ -AR. In addition, the side chains of  $\beta_2$ -AR K270 and A271 form hydrophobic interactions with the side chain of  $G\alpha_s$  L394.  $G\alpha_s$  L393 interacts with an Ile in helix 3 of the receptors: I468 in LHR and I135 in  $\beta_2$ -AR. Additional hydrophobic interactions in  $\beta_2$ -AR include V222 (helix 5) and V275 (helix 6). A salt bridge is predicted between  $G\alpha_s$  E392 and the Arg of the DRY motif (helix 3) of both receptors;  $G\alpha_s$  Y391 interacts with Y470 in IL2 of LHR and with I135 in helix 3 of  $\beta_2$ -AR. The additional interactions between  $G\alpha_s$  and  $\beta_2$ -AR, compared with LHR, are consistent with the differences observed in the potencies associated with the mutants of  $G\alpha_s$ .
